# Supplementary material for: Study on the Overmolding Process of Carbon-Fiber-Reinforced Poly (Aryl Ether Ketone) (PAEK)/Poly (Ether Ether Ketone) (PEEK) Thermoplastic Composites
Source: MDPI journal article supplement (doi:10.3390/ma16124456), 2023-06-18
Supplement: s1 [file s1]

**Electronic Supplementary Information (ESI):**

# **Study on the Overmolding Process of Carbon-Fiber-Reinforced Poly (Aryl Ether Ketone) (PAEK)/Poly (Ether Ether Ketone) (PEEK) Thermoplastic Composites**

**Ziyue Zhao, Jindong Zhang, Ran Bi, Chunhai Chen, Jianan Yao \* and Gang Liu \***

Center for Advanced Low-Dimension Materials, State Key Laboratory for  
Modification of Chemical Fibers and Polymer Materials, College of Materials  
Science and Engineering, Donghua University,  
Shanghai 201620, China

\* Correspondence: yjn@dhu.edu.cn (J.Y.); liugang@dhu.edu.cn (G.L.);  
Tel.: +86-21-67798670 (J.Y.)

## **List of Contents for Supplementary Materials:**

**Figure S1.** Relationship between interface temperature and shear strength

**Figure S2.** Surface temperature of prefabricated parts in relation to preheating time

**Figure S3.** Direction of damage morphological observation

According to the method used in [1] to calculate the interface temperature, i.e:

$$T_i = (T_{mold} + T_{inj})/2 \quad (1)$$

Where  $T_i$  is the interface temperature,  $T_{mold}$  is the mold temperature and  $T_{inj}$  is the injection temperature. Interface temperature through the mold temperature and melt temperature together control, according to Figure 1 shows, shear strength in the interface temperature of 320 °C after the stabilization, thereafter continue to increase the interface temperature and the impact on the shear strength is smaller, Figure 1 can be learned in the interface temperature of 320 °C, the mold temperature of 260 °C when the shear strength is higher, the final choice of mold temperature 260 °C, melt temperature 400 °C.

[1] Jiang, B.; Fu, L.; Zhang, M.; Weng, C.; Zhai, Z. Effect of thermal gradient on interfacial behavior of hybrid fiber reinforced polypropylene composites fabricated by injection overmolding technique. *Polym. Compos.* **2020**, *41*, 4064–4073. <https://doi.org/10.1002/pc.25693>.

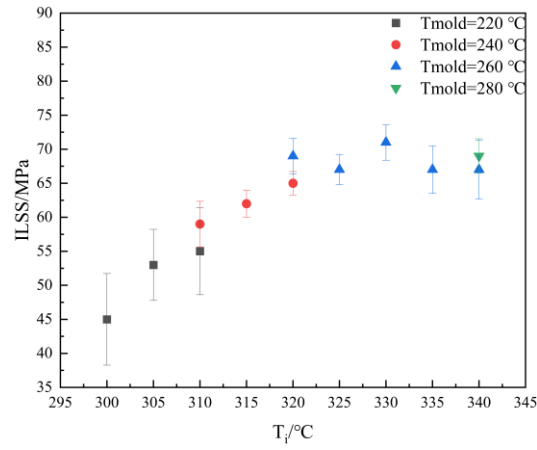

**Figure S1.** Relationship between interface temperature and shear strength

According to the relationship between the surface temperature of the precast and the preheating time, the surface temperature reaches 260 °C when the preheating time reaches 2 min, but in order to ensure that the whole precast reaches the preset temperature, the preheating time is set to 3 min. It can be observed that the surface temperature of the precast does not change from 3 min to 4 min, ensuring that the precast reaches the preset temperature. Therefore, a preheating time of 3 min was chosen.

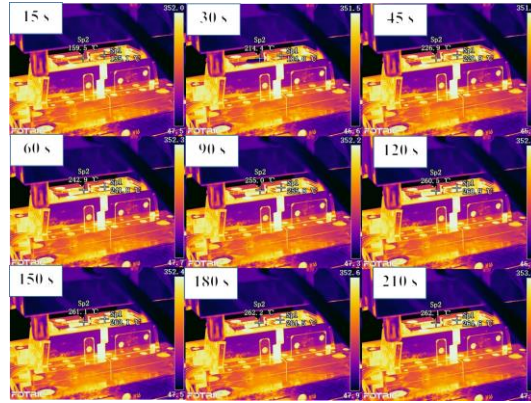

**Figure S2.** Surface temperature of prefabricated parts in relation to preheating time

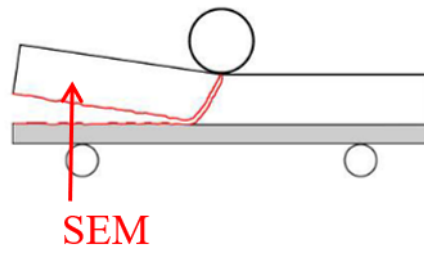

**Figure S3.** Direction of damage morphological observation
